# Supplementary material
Source: MDPI journal article supplement (https://www.mdpi.com/2073-4344/9/5/437)
Supplement: s1 [file s1]

# Supplementary Materials: Replacement of Chromium by Non-toxic Metals in Lewis-Acid MOFs: Assessment of Stability as Glucose Conversion Catalysts

Ralentri Pertiwi, Ryan Oozeerally, David L. Burnett, Thomas W. Chamberlain, Nikolay Cherkasov, Marc Walker, Reza J. Kashtiban, Yuni K. Krisnandi, Volkan Degirmenci, and Richard I. Walton

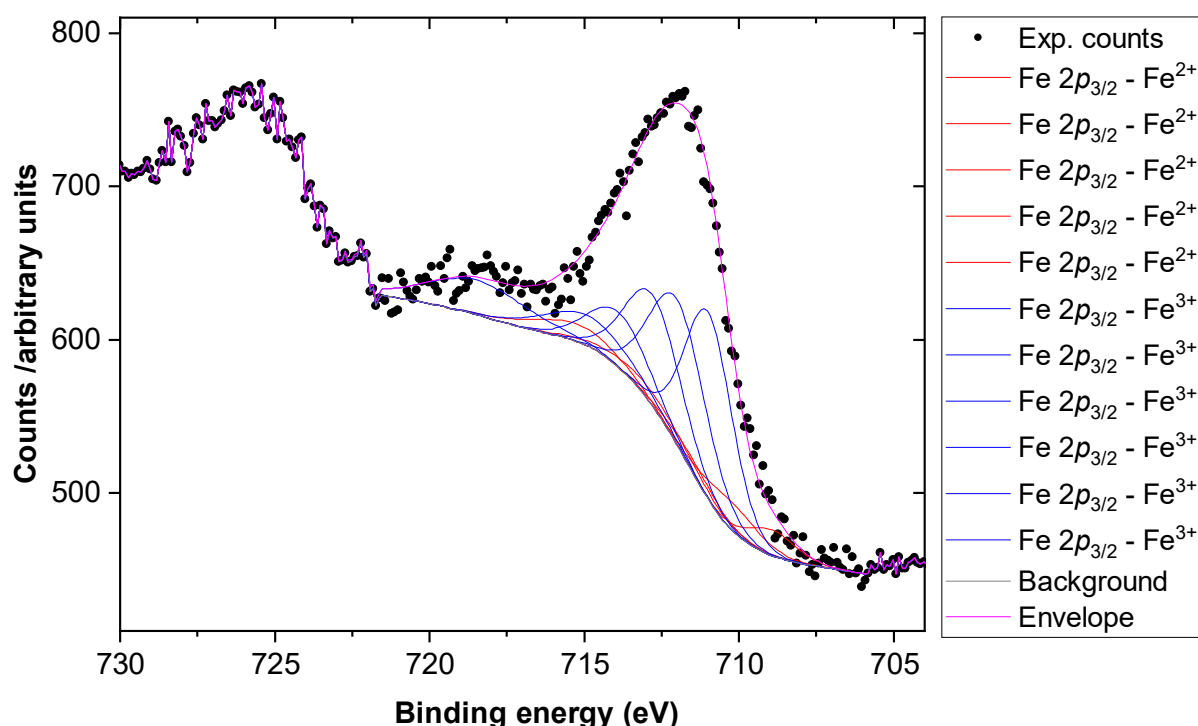

**Figure S1.** XPS of MIL-88B (Fe) in the Fe  $2p_{3/2}$  region. The fitted contributions are shown with reference spectra in the literature used for guidance.

**Table S1.** Assignment of key bands in the IR spectra<sup>1</sup>.

| Band /cm <sup>-1</sup> | Assignment                             |
|------------------------|----------------------------------------|
| 1685 (*)               | Free C=O                               |
| 1595 strong            | $\nu_{\text{ass}}(-\text{CO}_2)$ bound |
| 1490                   | C=C stretch (aromatic)                 |
| 1395 strong            | $\nu_{\text{sym}}(-\text{CO}_2)$ bound |
| 1135 (*)               | C–OH stretch                           |
| 875                    | C–H bending (aromatic)                 |
| 750                    | C–H bending (aromatic)                 |

Additional bands (\*) in the spectrum of the MIL-53(Fe,Sc) sample (see Figure 8 in the manuscript) suggest the presence of some un-coordinated carboxylic groups. This is not due to the presence of crystalline benzene-1,4-dicarboxylic acid (which is not seen in the powder XRD), suggesting a more defective structure for the mixed-metal material.

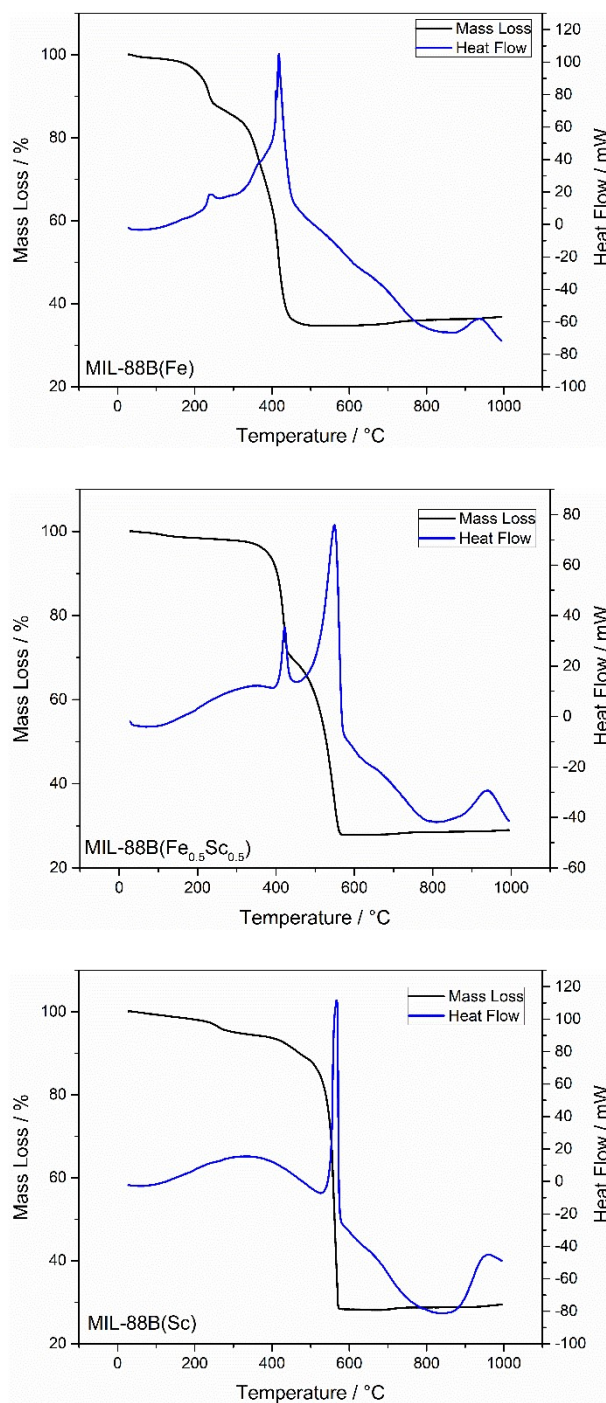

**Figure S2.** Thermogravimetric analysis of MIL-88B catalysts.

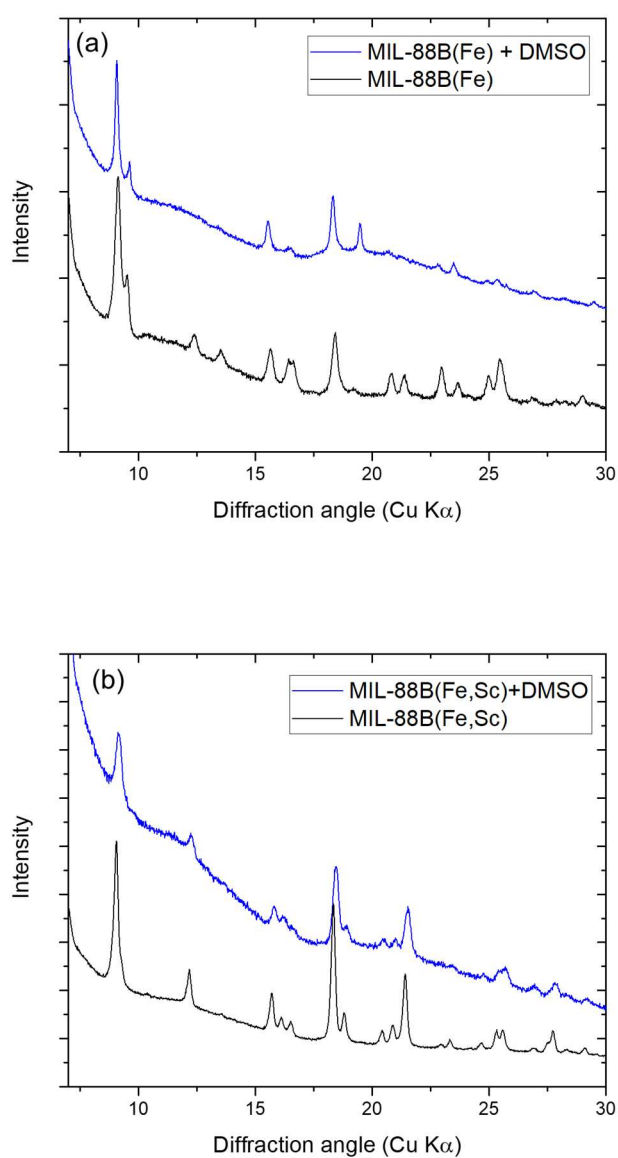

**Figure S3.** Powder XRD of (a) MIL-88B (Fe) and (b) MIL-88 (Fe,Sc) on samples immersed in DMSO.

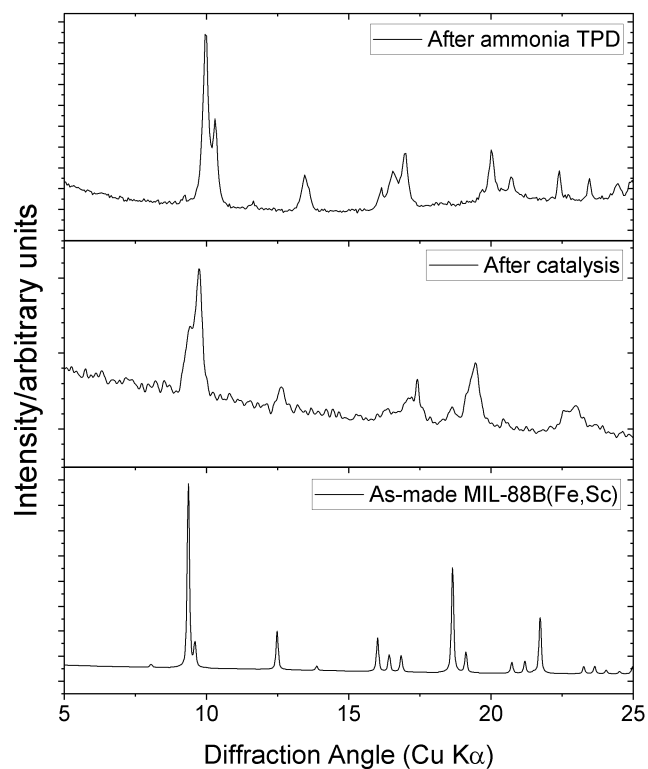

**Figure S4.** Powder XRD of MIL-88 (Fe,Sc) as-made, after catalysis, and after ammonia TPD. Note the sample after catalysis is contaminated with carbonaceous material (humins) and so the signal:noise ratio in the data is lower than in the other samples.

## References

- Solid-State Vibrational Spectra and Structures of Terephthalic Acid and the Terephthalate Ion, Tripathi, G. N. R.; Sheng, S.J. *J. Molec. Struct.*, **1979**, *57*, 21–34.
